# Supplementary material for: Aerobic Exercise Decreases Negative Affect by Modulating Orbitofrontal-Amygdala Connectivity in Adolescents
Source: MDPI journal article supplement (doi:10.3390/life11060577), 2021-06-18
Supplement: s1 [file s1]

# Supplementary material of Aerobic Exercise Decreases Negative Affect by Modulating Orbitofrontal-Amygdala Connectivity in Adolescents

**Table S1.** The behavioral measures at baseline and after intervention condition in acute exercise group and control groups.

|            | AG         |             |          | CG          |             |          |
|------------|------------|-------------|----------|-------------|-------------|----------|
|            | PRE        | POST        | <i>p</i> | PRE         | POST        | <i>p</i> |
| A-POMS     |            |             |          |             |             |          |
| Tension    | 4.00±2.17  | 3.67±2.53   | 0.438    | 6.18±4.71   | 4.73±4.52   | 0.064    |
| Anger      | 2.00±1.48  | 1.33±1.67   | 0.159    | 3.73±4.47   | 3.09±4.57   | 0.107    |
| Fatigue    | 4.33±2.42  | 3.75±2.93   | 0.254    | 6.27±5.69   | 6.00±6.10   | 0.180    |
| Depression | 2.00±2.34  | 1.83±2.48   | 0.672    | 3.27±4.94   | 3.64±6.20   | 0.739    |
| Vigor      | 15.92±2.81 | 16.92±3.00  | 0.202    | 15.36±4.82  | 16.27±4.24  | 0.120    |
| Confusion  | 4.58±2.68  | 3.92±2.78   | 0.321    | 6.18±5.10   | 5.73±4.94   | 0.472    |
| Esteem     | 11.42±2.84 | 11.58±3.55  | 0.569    | 11.36±3.04  | 11.73±1.90  | 0.569    |
| TMD        | 89.58±6.36 | 86.00±10.49 | 0.169    | 98.91±25.17 | 95.18±27.19 | 0.065    |
| PANAS      |            |             |          |             |             |          |
| PA         | 32.83±4.69 | 38.17±20.23 | 0.663    | 33.91±5.49  | 33.27±6.23  | 0.473    |
| NA         | 18.00±3.52 | 13.58±3.45  | 0.005    | 19.91±5.97  | 17.09±6.64  | 0.043    |

AG, acute exercise group; CG, control group; A-POMS, the abbreviated profile of mood state; TMD, total mood disturbance; PANAS, Positive and Negative Affect Schedule; PA, positive affect; NA, negative affect. Bonferroni-adjusted *p* < 0.005.

**Table S2.** Generalized estimating equation analysis for behavioral measures.

|            | Time          |          | Group         |          | Time*Group    |          |
|------------|---------------|----------|---------------|----------|---------------|----------|
|            | Wald $\chi^2$ | <i>p</i> | Wald $\chi^2$ | <i>p</i> | Wald $\chi^2$ | <i>p</i> |
| Tension    | 5.363         | 0.021    | 0.714         | 0.398    | 2.031         | 0.154    |
| Anger      | 47.568        | <0.001   | 0.602         | 0.438    | 0.393         | 0.531    |
| Fatigue    | 1707.105      | <0.001   | 0.396         | 0.529    | 59.339        | <0.001   |
| Depression | 209.570       | <0.001   | 0.032         | 0.858    | 13.098        | <0.001   |
| Vigor      | 7.051         | 0.008    | 0.028         | 0.866    | 0.020         | 0.889    |
| Confusion  | 9.504         | 0.002    | 0.917         | 0.338    | 0.079         | 0.779    |
| Esteem     | 0.193         | 0.661    | 0.121         | 0.728    | 0.002         | 0.968    |
| TMD        | 4188.235      | <0.001   | 1.342         | 0.247    | 1.624         | 0.203    |
| PA         | 0.557         | 0.455    | 0.067         | 0.795    | 1.020         | 0.313    |
| NA         | 28.270        | <0.001   | 1.218         | 0.270    | 0.478         | 0.489    |

TMD, total mood disturbance; PA, positive affect; NA, negative affect.  
Bonferroni-adjusted *p* < 0.005.

**Table S3.** Correlations between changes in functional connectivity and behavioral changes.

|       |   | Tension | Anger  | Fatigue | Depression | Vigor | Confusion | Esteem | TMD    | PA     | NA     |
|-------|---|---------|--------|---------|------------|-------|-----------|--------|--------|--------|--------|
| AG_FC | r | -0.345  | -0.147 | -0.016  | -0.778     | 0.270 | -0.413    | 0.000  | -0.449 | 0.067  | -0.443 |
|       | p | 0.329   | 0.686  | 0.966   | 0.008      | 0.450 | 0.236     | 1.000  | 0.193  | 0.855  | 0.200  |
| CG_FC | r | 0.247   | -0.462 | 0.339   | 0.464      | 0.029 | 0.706     | -0.119 | 0.346  | -0.426 | 0.279  |
|       | p | 0.555   | 0.249  | 0.412   | 0.247      | 0.946 | 0.050     | 0.780  | 0.401  | 0.293  | 0.504  |

AG\_FC/CG\_FC, the change of functional connectivity between amygdala and right orbitofrontal cortex in acute exercise group or control group;.

**Table S4.** Voxel-wised functional connectivity of bilateral amygdala to other brain regions.

| Seed ROI          | Cluster      | Regions                                         | Peak Coordinate (X<br>Y Z) | Cluster Size<br>(Voxels) | Peak Intensity (t<br>value) |
|-------------------|--------------|-------------------------------------------------|----------------------------|--------------------------|-----------------------------|
| Right<br>Amygdala | Cluster<br>1 | right middle frontal gyrus<br>(orbital part)    | 30 54 -6                   | 42                       | 6.26843                     |
|                   |              | right superior frontal gyrus<br>(orbital part)  |                            |                          |                             |
|                   | Cluster<br>2 | right superior frontal gyrus<br>(dorsolateral)  | 15 12 57                   | 15                       | 5.72954                     |
|                   |              | right supplementary motor area                  |                            |                          |                             |
| Left<br>Amygdala  | Cluster<br>3 | right median cingulate                          | 12 15 33                   | 11                       | 5.42893                     |
|                   |              | left inferior frontal gyrus (orbital<br>part)   |                            |                          |                             |
|                   | Cluster<br>4 | left middle frontal gyrus (orbital<br>part)     | -33 42 -3                  | 9                        | 6.22811                     |
|                   |              | right middle frontal gyrus<br>(orbital part)    |                            |                          |                             |
| Left<br>Amygdala  | Cluster<br>1 | rights superior frontal gyrus<br>(orbital part) | 30 51 -3                   | 9                        | 4.76529                     |
|                   |              |                                                 |                            |                          |                             |

All were corrected for multiple comparisons with the Gaussian Random Field (GRF) theory ( $p < 0.001$  at voxel-level,  $p < 1$  at cluster level, two-tailed). Only the FC between right amygdala and Cluster 1 was statistically significant ( $p < 0.01$  at cluster level).

**Table S5.** FC intensity and significant level before and after intervention in all participants and the acute exercise group.

|     | Pre  |      |           | Post |      |            |
|-----|------|------|-----------|------|------|------------|
|     | t    | z    | p         | t    | z    | p          |
| ALL | 8.99 | 5.77 | 8.014E-09 | 6.71 | 4.90 | 9.592E-07  |
| AG  | 5.72 | 3.82 | 1.33E-04  | 7.96 | 4.50 | 6.8913E-06 |

The functional connection between the amygdala and the right orbitofrontal cortex was examined by a one sample t test.

**Table S6.** Correlations between changed FC, affect scores, and HR.

|                    | FC       | Tension | Anger  | Fatigue | Depression | Vigor  | Confusion | Esteem | TMD    | PA    | NA     |
|--------------------|----------|---------|--------|---------|------------|--------|-----------|--------|--------|-------|--------|
| <b>Baseline_HR</b> | r -0.180 | 0.449   | 0.379  | -0.023  | 0.010      | -0.004 | -0.004    | 0.438  | 0.063  | 0.504 | 0.254  |
|                    | p 0.575  | 0.143   | 0.224  | 0.944   | 0.976      | 0.990  | 0.989     | 0.155  | 0.845  | 0.095 | 0.426  |
| <b>Exercise_HR</b> | r 0.018  | -0.131  | -0.097 | -0.546  | -0.103     | 0.107  | -0.135    | 0.209  | -0.333 | 0.382 | -0.097 |
|                    | p 0.956  | 0.684   | 0.765  | 0.066   | 0.749      | 0.742  | 0.676     | 0.514  | 0.291  | 0.220 | 0.763  |

The correlation between HR (Baseline HR and Exercise HR) and FC alteration as well as the correlation between HR and affect scores changes.

FC, the change of functional connectivity between amygdala and right orbitofrontal cortex.
